# Supplementary material
Source: Springer Nature journal article supplement (https://www.springermedizin.de/resource/supplementary/12879_2009_937_MOESM7_ESM.pdf/9449688)

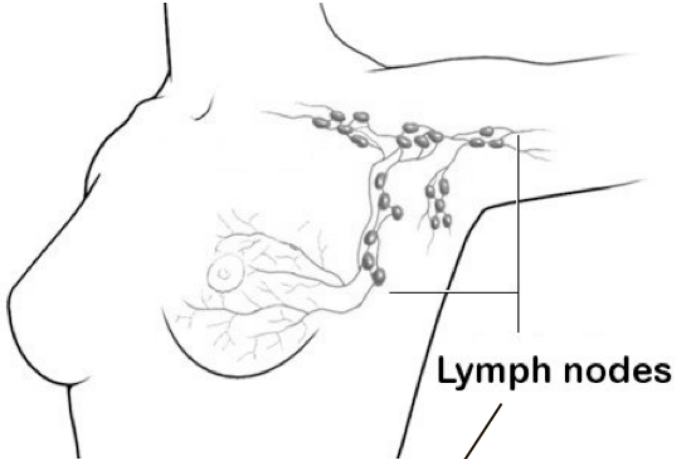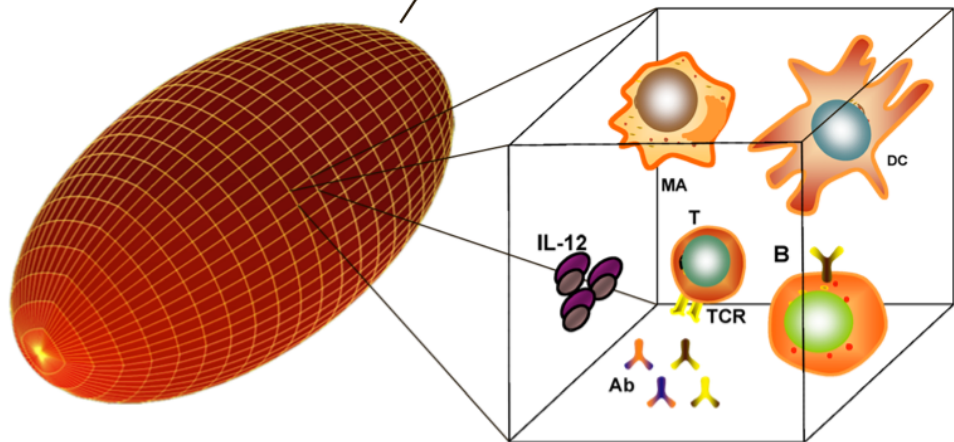

Supplement: MOESM7 [file 9449688]
